# Supplementary figures and images for: C/EBPβ mediates NQO1 and GSTP1 anti-oxidative reductases expression in glioblastoma, promoting brain tumor proliferation
Source: PubMed Central journal article supplement — Redox Biol. 2020 May 21;34:101578. doi: 10.1016/j.redox.2020.101578 (PMC7287278; doi:10.1016/j.redox.2020.101578), 2020-05-21

# Supplementary Figure 1

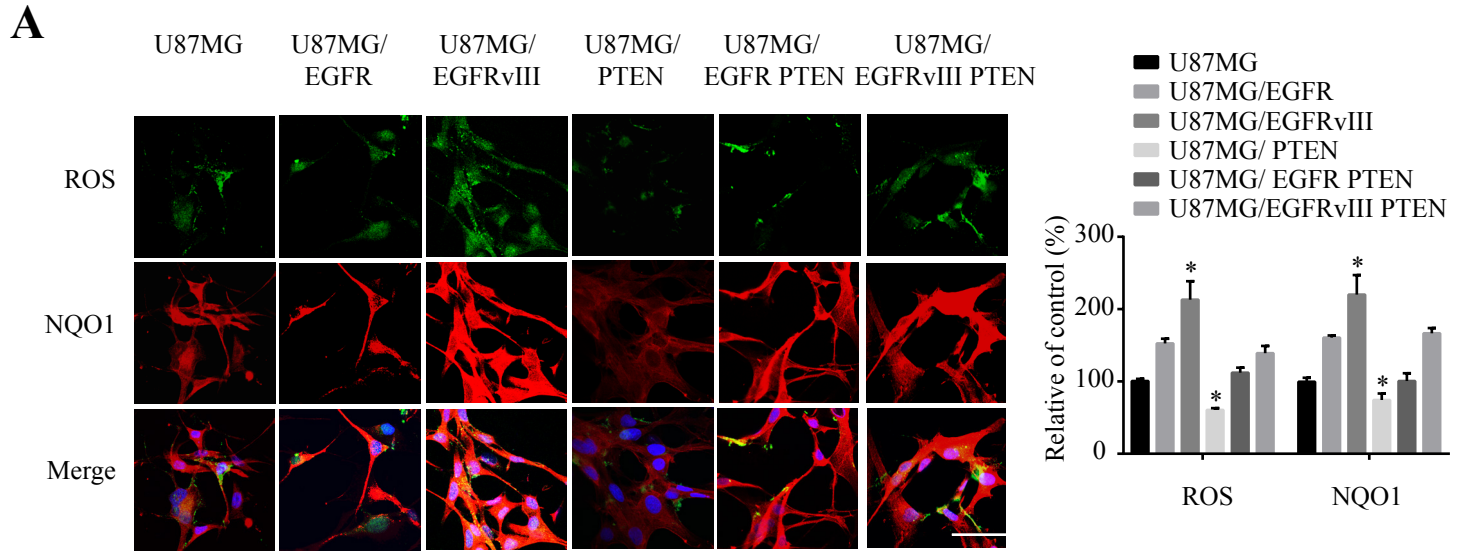

Supplement: mmc1.pdf [file mmc1.pdf]

# Supplementary Figure 2

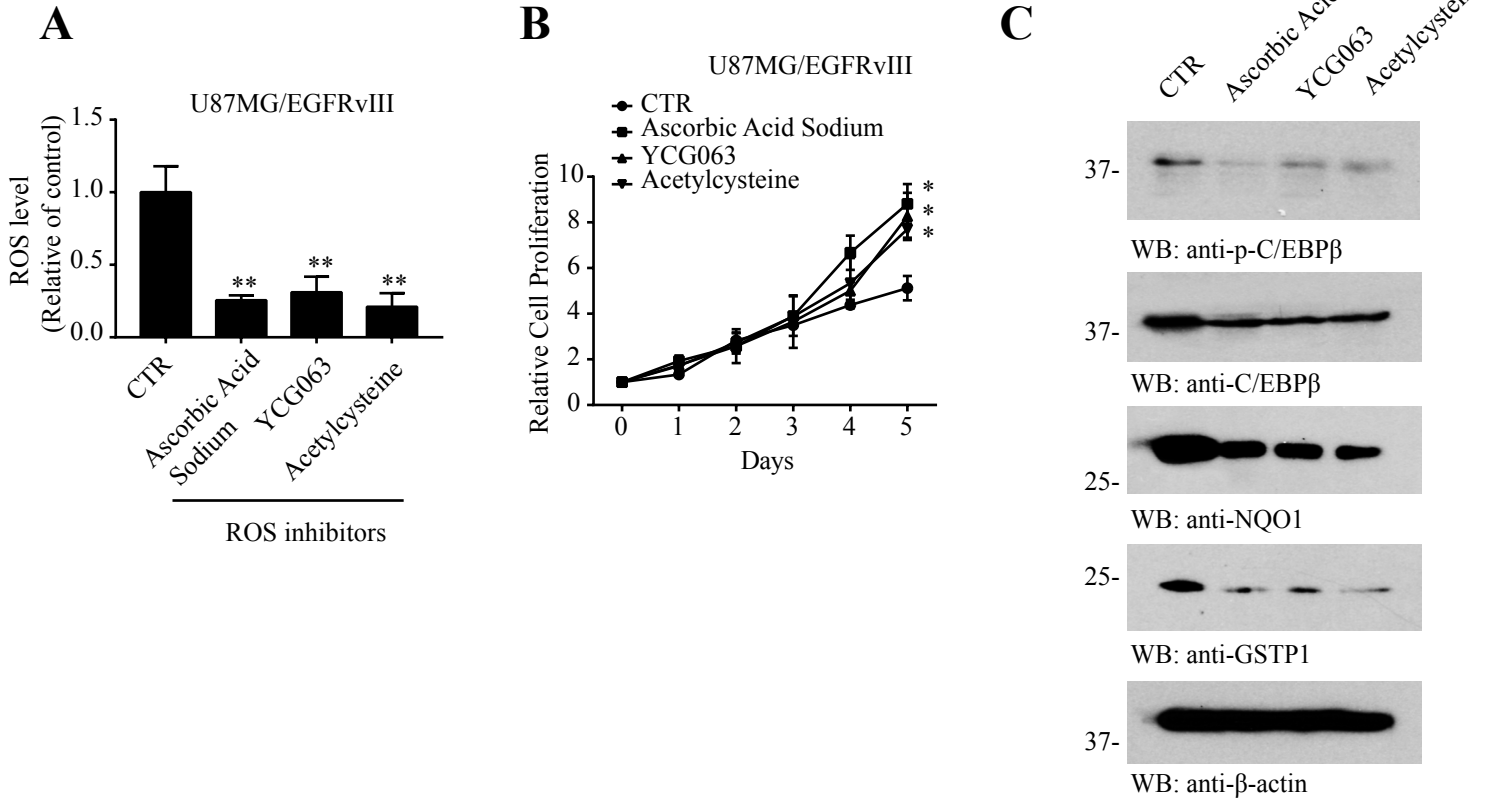

Supplement: mmc2.pdf [file mmc2.pdf]

# Supplementary Figure 3

**A**

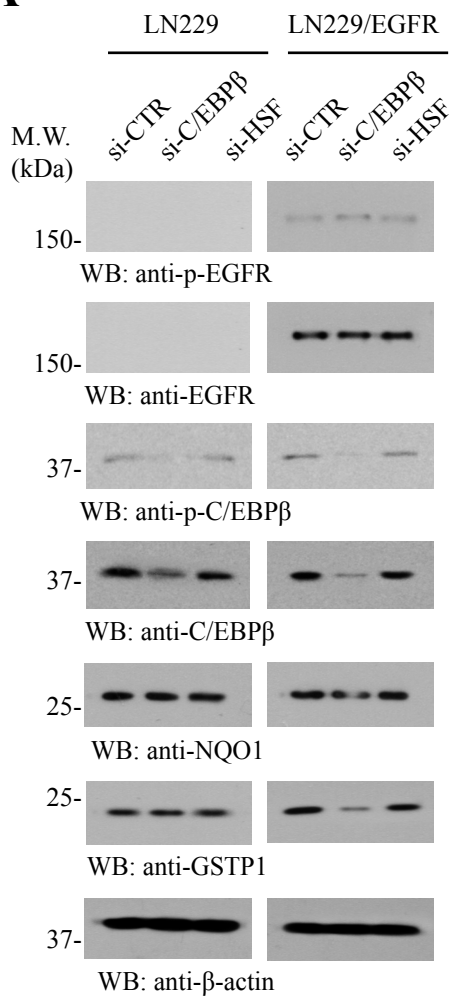

**B**

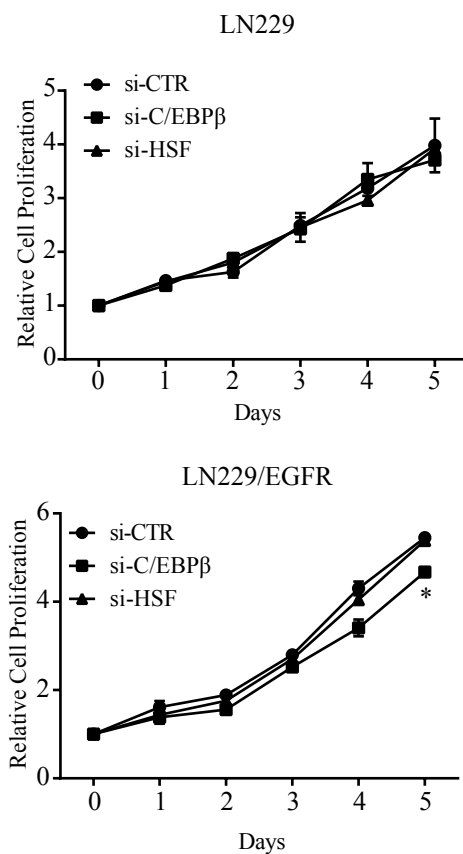

**C**

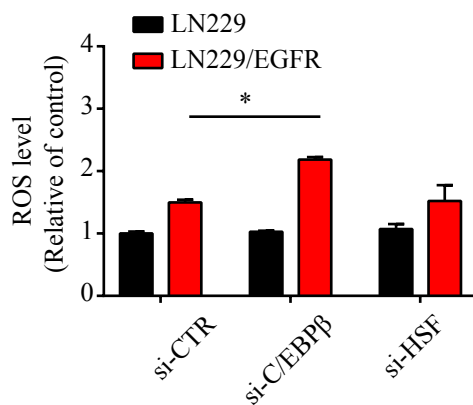

**D**

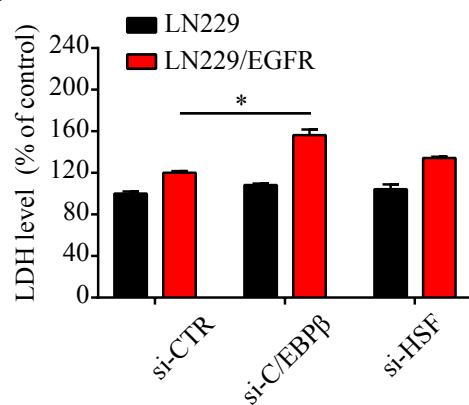

Supplement: mmc3.pdf [file mmc3.pdf]

# Supplementary Figure 4

**A**

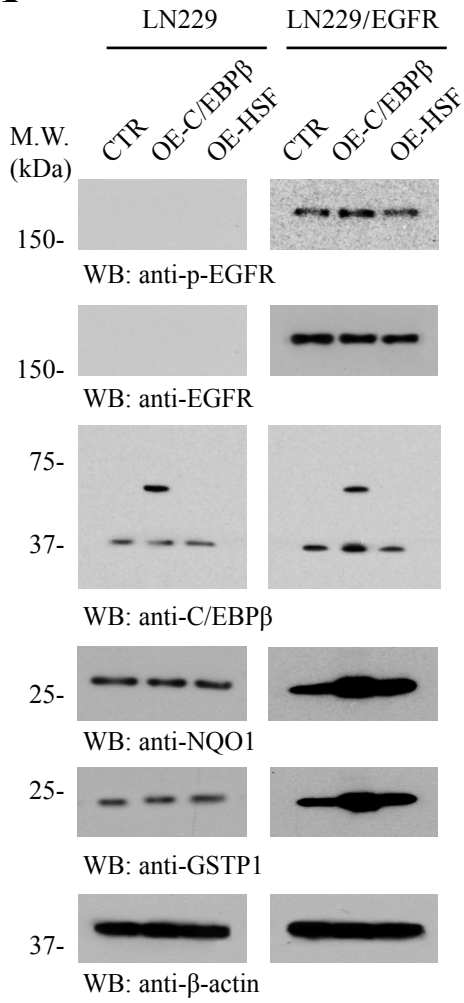

**B**

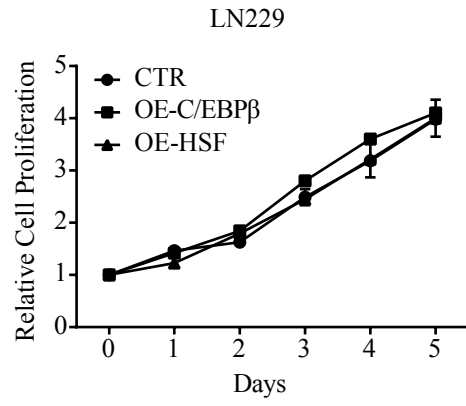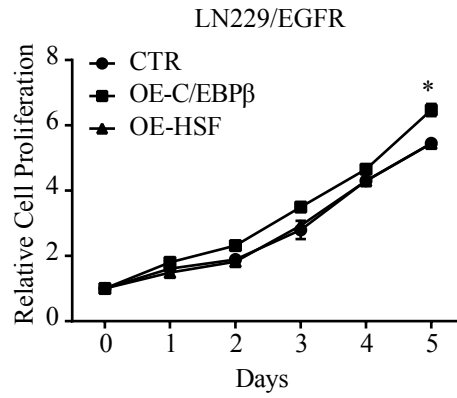

**C**

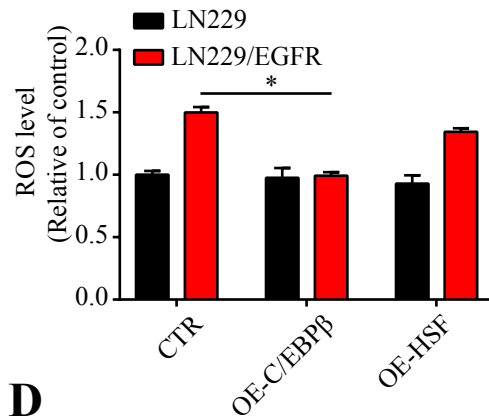

**D**

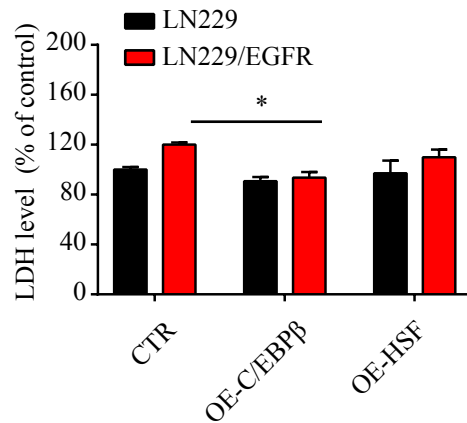

Supplement: mmc4.pdf [file mmc4.pdf]

# Supplementary Figure 5

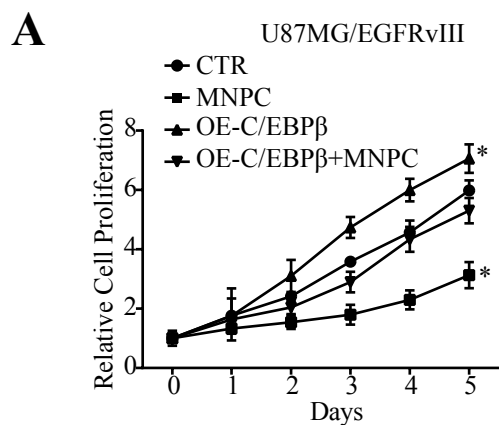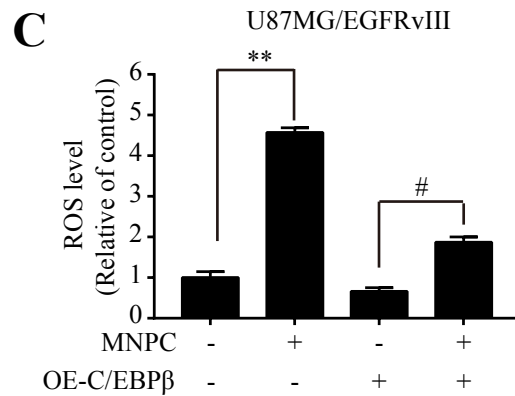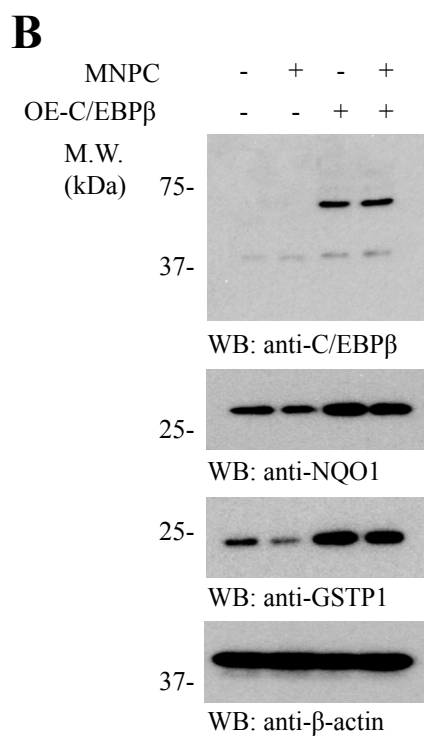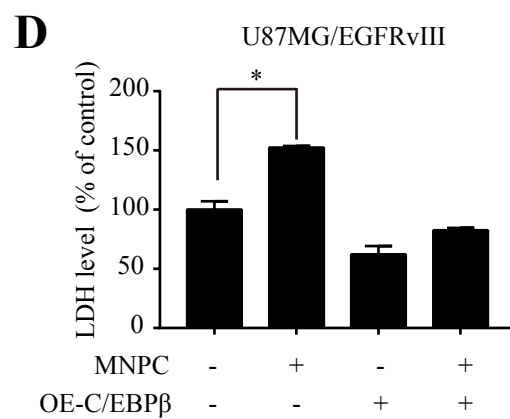

Supplement: mmc5.pdf [file mmc5.pdf]

# Supplementary Figure 6

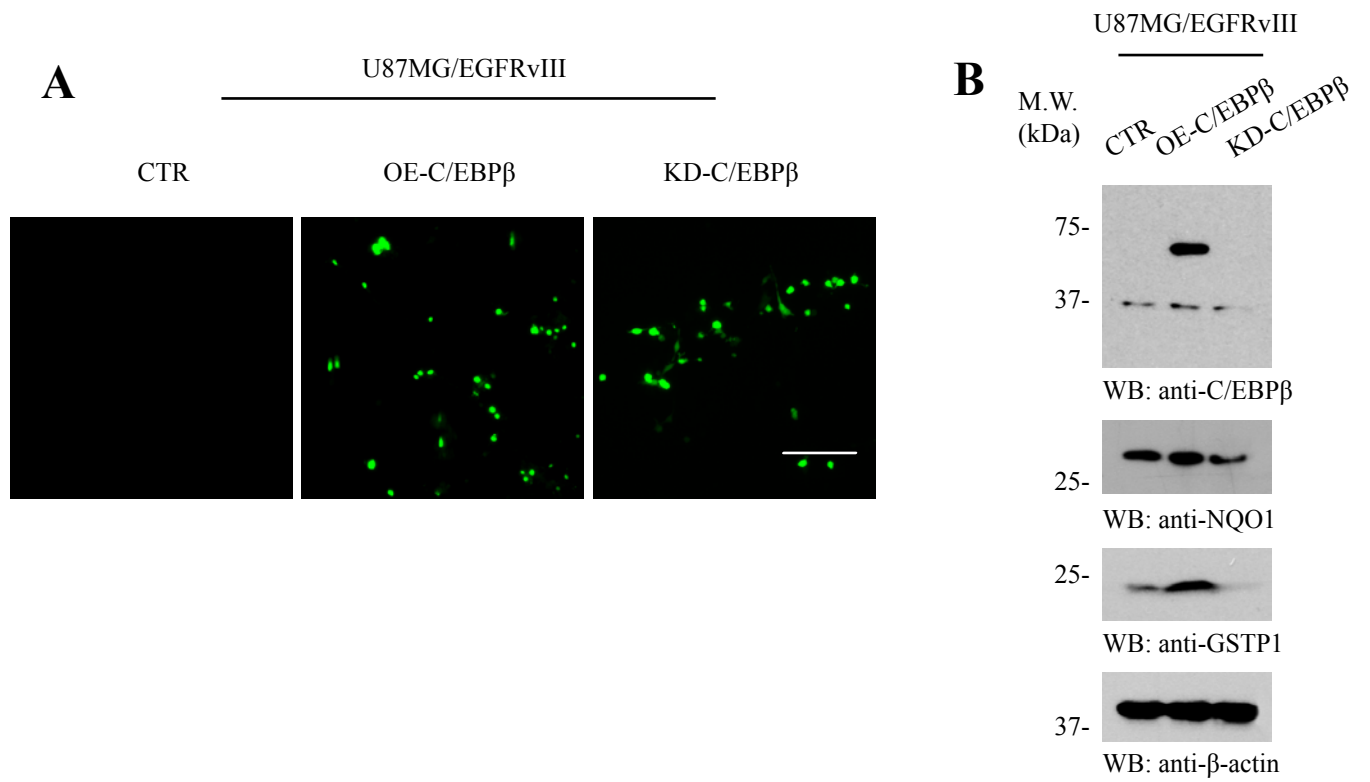

Supplement: mmc6.pdf [file mmc6.pdf]
